1 **Energy metabolites mediated cross-protection to heat, drought and starvation induced**  
2 **plastic responses in tropical *D.ananassae* of wet-dry seasons**

3

4 **Chanderkala Lambhod, Ankita Pathak, Ashok K Munjal and Ravi Parkash\***

5 Department of Genetics, Maharshi Dayanand University, Rohtak – 124001; Department of  
6 Biochemistry and Genetics, Barkatullah University, Bhopal – 462026, India

7

8

9 **Running title:** Seasonal changes in energy metabolites (34)

10

11

12 **Key words:** Wet-dry seasons, Plastic changes, Stress related traits, energy metabolites, Cross-  
13 protection, *Drosophila ananassae*

14 \*Author for correspondence: (rpgenetics@gmail.com)

15

16 **Summary statement**

17 In the tropical *Drosophila ananassae*, low or high humidity induced plastic changes in energy  
18 metabolites provide cross-protection to seasonally varying climatic stressors.

19

20

21

22

23

24 **ABSTRACT**

25 Cross-tolerance effects for cold and drought stressors are well known for temperate and polar  
26 ectothermic organisms. However, less attention has been paid to plastic changes induced by wet-  
27 dry conditions for the tropical insect taxa. *Drosophila ananassae* is abundant in wet habitats but  
28 its desiccation sensitivity is likely to make it vulnerable under expected drought conditions due  
29 to climate change. We tested plastic effects of heat hardening, acclimation to drought or  
30 starvation; and changes in trehalose, proline and body lipids in *D. ananassae* flies reared under  
31 wet or dry season specific conditions. Wet season flies showed significant increase in heat  
32 knockdown, starvation resistance and body lipids after heat hardening. However, accumulation  
33 of proline was observed only after desiccation acclimation of dry season flies while wet season  
34 flies elicited no proline but trehalose only. Thus, drought induced proline can be a marker  
35 metabolite for dry season flies. Further, partial utilization of proline and trehalose under heat  
36 hardening reflects their possible thermoprotective effects. Heat hardening elicited cross-  
37 protection to starvation stress. Stressor specific accumulation or utilization as well as rates of  
38 metabolic change for each energy metabolite were significantly higher in wet season flies than  
39 dry season flies. Energy budget changes due to inter-related stressors (heat vs desiccation or  
40 starvation) resulted in possible maintenance of energetic homeostasis in wet or dry season flies.  
41 Thus, low or high humidity induced plastic changes in energy metabolites can provide cross-  
42 protection to seasonally varying climatic stressors.

43

44

45

46

47

48

49

50

## 51 INTRODUCTION

52 In temperate regions, ectothermic organisms encounter a greater range of colder environments  
53 (freezing to mild warm), as well as changes in other abiotic factors which affect their  
54 acclimatization to improve survival under harsh climatic conditions (Angilletta , 2009; Sinclair,  
55 2015). Ectothermic organisms from temperate or polar regions are able to cope with seasonally  
56 varying climatic stressors through developmental as well as adult acclimation during their life  
57 time (Denlinger and Lee, 2010). However, lesser attention has been paid to acclimatization of  
58 tropical ectothermic organisms (Whitman and Ananthkrishnan, 2009). Tropical drosophilids  
59 encounter significant seasonally varying low vs high relative humidity conditions while thermal  
60 changes are quite limited i.e. 24 to 30 °C ([www.tropmet.res.in](http://www.tropmet.res.in)).

61 In tropical regions, seasonal changes in humidity conditions play a major role in affecting  
62 morphological, physiological and life history traits (Tauber et al., 1986; Tauber et al., 1998). For  
63 example, role of humidity has been demonstrated for dry season induced diapause in some  
64 tropical insects (Pires et al., 2000; Seymour and Jones, 2000); increased desiccation resistance  
65 due to low humidity developmental acclimation in *D. leontia* (Parkash and Ranga, 2014); and  
66 due to effect of humidity acclimation on heat resistance in adult flies of *D. simulans* (Bubliy et  
67 al., 2013). Further, another study on tropical *D. jambulina* has shown effect of low vs high  
68 humidity acclimation on mating related traits of darker and lighter morphs consistent with  
69 melanism-desiccation hypothesis (Parkash et al., 2009). This study has shown that the  
70 frequencies of melanic and non-melanic morphs of *D. jambulina* are driven by humidity changes  
71 and not due to thermal conditions (Parkash et al., 2009). However, plastic changes induced by  
72 multiple stressors for tropical insect taxa of wet – dry seasons have received less attention  
73 (Tauber et al., 1998; Chown et al., 2011).

74 In Southeast Asia, changes in relative humidity associated with reduced patterns of  
75 rainfall due to El nino and climate warming are likely to increase drier conditions affecting  
76 survival of tropical insect taxa ([www.skymetweather.com](http://www.skymetweather.com); [www.imd.gov.in](http://www.imd.gov.in)). Therefore,  
77 assessment of acclimatization potential of stenothermal tropical drosophilids reared under wet –  
78 dry conditions can help in understanding species specific stress resistance potential to multiple  
79 stressors and likely consequences on their fitness and survival (Hoffmann, 2010).

80 During their life time, ectothermic organisms (freeze tolerant, freeze avoiding or chill  
81 susceptible) undergo stressor induced plastic changes in stress resistance traits as well as

82 metabolic fuels for survival under harsh climatic conditions (Denlinger and Lee, 2010; Sinclair et  
83 al., 2013). Analyses of cold induced plastic changes in metabolites have emphasized the role of  
84 different cryoprotective colligative solutes such as sugars, polyols and free amino acids  
85 (Overgaard et al., 2007; Michaud et al., 2008; Kostal et al., 2011b; Colinet et al., 2012). First, the  
86 role of exogenous trehalose to increase resistance to cold has been shown in *Belgica antarctica*  
87 (Benoit et al., 2009). Second, laboratory flies of *D. melanogaster* subjected to cold shock at -7  
88 °C for 2-3 h; as well as strains resisting chilling injury at 0 °C for 30 to 60 h, revealed 3 to 6 fold  
89 increase in the level of proline (Misener et al., 2001). Accumulation of proline in response to  
90 cold stress has been demonstrated in the larvae of *D. melanogaster* (Kostal et al., 2011b); in  
91 *Chymomyza costata* larvae (Kostal et al., 2011a). Third, In the gall fly *Eurosta solidaginis*, cold  
92 induced energy metabolites include glycerol and sorbitol (Lee, 2010). Fourth, as compared to  
93 many studies on sugars and polyols, changes in free amino acids accumulated in response to  
94 different climatic stressors have been investigated in few insect taxa (Fields et al., 1998; Misener  
95 et al., 2001); and in a arthropod (Issartel et al., 2005) .Thus, plastic responses to cold involve  
96 different physiological mechanisms based on different energy metabolites.

97 In tropical habitats, heat as well as drought stress co-occur and proline has been shown to  
98 play a role in thermoprotection of some plant taxa (Verbruggen and Hermans, 2008). The role of  
99 proline as an osmolyte to mitigate water stress was first reported in wilting perennial rye grass -  
100 *Lolium perenne* (Kemble and MacPherson, 1954) and subsequently in bacteria (Csonka and  
101 Hanson, 1991). Higher levels of proline have been observed in *Arabidopsis thaliana* (Liang et  
102 al., 2013) and in drought-tolerant rice varieties (Choudhary et al., 2005) but not in case of barley  
103 (Chen et al., 2007). Therefore, associations between high proline levels and drought tolerance  
104 have shown mixed results in plants and need further studies. Proline has been considered as a  
105 multifunctional amino acid due to its role as cryoprotectant and / or osmoprotectant and in  
106 mitigating oxidative stress in plants (Szabados and Savoure, 2009). However, a recent study has  
107 shown accumulation of proline due to drought stress in *D. immigrans* (Tamang et al., 2017).  
108 Thus, despite the abundant level of proline in insects, its physiological role(s) in diverse insect  
109 taxa need further studies.

110 In ectothermic organisms, survival under harsh environments depends upon maintenance  
111 of energetic homeostasis in metabolic fuels after possible perturbations due to climatic stressors  
112 (Benoit et al., 2009; Sinclair et al., 2013; Williams et al., 2014; Sinclair, 2015). In this respect,

113 some studies have evidenced cold induced changes in metabolites through targeted  $^1\text{H}$  NMR  
114 based metabolomics (Overgaard et al., 2007; Michaud et al., 2008; Colinet et al., 2012). Based  
115 on metabolic profiling of temporal changes (during recovery), protective role of cold or heat  
116 hardening is evident from faster attaining of homeostasis of metabolites to normal level as  
117 compared to perturbations in metabolic pool in the control groups of *D. melanogaster*  
118 (Malmendal et al., 2006; Overgaard et al., 2007; Kostal et al., 2011b; Williams et al., 2014).  
119 However, efforts to find marker metabolites induced by cold or drought or heat stress have  
120 shown similarities as well as differences. For example, Antarctic midge *Belgica antarctica* has  
121 shown some overlap in the accumulation of glycogen and erythritol due to cold or drought  
122 acclimation while reduction in the level of serine was evident in response to cold, drought and  
123 heat stress (Michaud et al., 2008). In nature, acclimatization of ectothermic organisms involves  
124 developmental as well as adult acclimation. Therefore, NMR metabolic profiling of field  
125 acclimatized insects may further help in understanding stressor induced plastic changes in the  
126 metabolome. Further, there is need to examine energy metabolites mediated cross-protection to  
127 multiple stressors in insect taxa living under seasonally varying environments of tropical regions.

128 Temperature is considered as a major abiotic factor affecting geographical distribution  
129 and abundance levels of various insect taxa (Andrewartha and Birch, 1970; Angilletta, 2009).  
130 Narrow distribution patterns of tropical *Drosophila* species are limited by their low genetic  
131 potential to adapt to colder and drier habitats (Kellermann et al., 2009). Further, in context of  
132 climate warming, it has been argued that tropical drosophilids might be vulnerable due to  
133 expected higher aridity conditions (Hoffmann, 2010; Chown et al., 2011). Despite the fact that  
134 plastic changes in stress resistance traits in the generalist species, *D. melanogaster* are higher as  
135 compared with genetic differences, similar studies have not been carried out for tropical  
136 *Drosophila* species (Hoffmann et al., 2005). On the Indian subcontinent, there are contrasting  
137 seasonal patterns of ambient relative humidity ( $80 \pm 5\%$  RH during monsoon but  $40 \pm 6\%$  RH  
138 during autumn). Therefore, assessment of season specific humidity acclimation on induced stress  
139 resistance as well as their cross-tolerance effects can help in understanding adaptive potential of  
140 tropical *D. ananassae*.

141 In the present work, we assessed season-specific as well as sex- specific plastic changes  
142 in stress related traits as well as changes in the levels of three energy metabolites in the tropical  
143 *D. ananassae* which is characterized by low desiccation resistance. Wild – caught flies of *D.*

144 *ananassae* from wet (monsoon) and dry (autumn) seasons were reared under season specific  
145 simulated growth conditions and flies were tested for basal as well as induced level of resistance  
146 to heat, desiccation and starvation resistance. For each stressor, we tested cross resistance for  
147 other two stressors. Further, we investigated patterns of changes (accumulation and / or  
148 utilization) for each of the three metabolic fuels due to plastic changes. For control as well as  
149 acclimated flies, changes in energy budget were also estimated. The rates of change in the levels  
150 of three energy metabolites were assessed in three replicates of multiple groups of flies subjected  
151 to different time durations of heat hardening, desiccation or starvation acclimation. Thus, we aim  
152 to find stressor induced plastic changes for possible maintenance of energetic homeostasis in the  
153 tropical *D. ananassae* from wet or dry seasons.

154

## 155 **MATERIAL AND METHODS**

### 156 **Collection and Cultures**

157 Wild-caught *Drosophila* species were collected during two seasons wet or rainy (July and  
158 August) and dry or autumn (Mid September to mid November) from five local sites but each one  
159 separated by ~ 3 to 4 km in the university town Rohtak (Latitude 28.08 °N, Altitude 220m) in the  
160 year 2015. The flies were collected during one week in the mid of rainy or autumn season. Based  
161 on our past collection records, the relative abundance of *Drosophila ananassae* is ~30% in rainy  
162 season and ~20% in the autumn. Therefore, we collected 730 flies in rainy season and 416 flies  
163 in autumn season which included different *Drosophila* species. However in the laboratory,  
164 assortment of wild-caught flies provided 192 flies of *D. ananassae* in rainy season and 136 in  
165 autumn season. For each season, flies were used to set up three replicate populations in 300 ml  
166 culture bottles, each with 40 pairs of *D. ananassae*. Further, adult flies of each bottle were  
167 allowed to oviposit on cornmeal-yeast-agar medium in four culture bottles in order to maximize  
168 the number of laboratory raised flies. The wet season wild-caught flies were reared under wet  
169 season specific simulated condition ( $26\pm 1^{\circ}\text{C}$  and  $78\pm 2\%$  RH). The resulting adult flies of G<sub>1</sub> and  
170 G<sub>2</sub> were used for assessment of basal, acclimated, cross-tolerance effects of three stressors (heat,  
171 drought and starvation) along with simultaneous analysis of control or unacclimated flies. For  
172 wet season, one week old flies of G<sub>1</sub> and G<sub>2</sub> generations were analyzed for changes in three  
173 stress related traits as well as energy metabolites (body lipids, proline and trehalose). Thus, all  
174 experiments on wet season flies were completed before the onset of autumn season. Likewise,

175 for autumn or dry season, collection of wild flies, setting up of mass populations in triplicate and  
176 rearing under dry condition ( $25\pm 1^\circ\text{C}$ ;  $40\pm 2\%$  RH) were conducted during the autumn season. For  
177 dry season flies, 1 stress resistance traits (heat knockdown, desiccation or starvation resistance) as  
178 well as energy metabolites (trehalose, proline and total body lipids contents), were assessed in  
179 three replicates of thirty flies. Control experiments were run simultaneously.

180

### 181 **Stress resistance assays**

182 (a) Heat knockdown time was measured in three replicates of thirty flies of both the seasons.  
183 Individual males and females were placed into 5mL glass vials submerged into a water bath at a  
184 constant temperature of  $37^\circ\text{C}$ . Flies were scored for knockdown time (in minutes and seconds).

185

186 (b) Desiccation resistance was measured as the time to dehydration effect under dry air ( $\sim 8\%$   
187 RH) in flies of both the sexes of wet or dry season. Each vial contained 2 g of silica gel at the  
188 bottom overlain with a foam disc to avoid contact with flies. We placed ten flies in such plastic  
189 vials ( $40 \times 100$  mm) in which open end was covered with muslin cloth. Finally, such vials were  
190 kept in the desiccator chamber (Secador electronic desiccator cabinet; [www.tarsons.in](http://www.tarsons.in)) which  
191 maintained  $\sim 8\%$  relative humidity. Number of immobile flies was counted after hourly intervals;  
192 and  $LT_{100}$  values were recorded.

193

194 (c) For three replicates of thirty flies, starvation resistance was measured as survival time till  
195 death under humid conditions ( $\sim 90\%$  RH) but without food. Ten adult flies were placed in a dry  
196 plastic vial which contained foam sponge impregnated with 8 ml of water + 2 mg sodium  
197 benzoate (to prevent any bacterial growth). The mortality time was recorded twice a day till all  
198 flies died from starvation.

199

### 200 **Assessment of direct and cross-tolerance effects**

201 Direct as well as cross-tolerance effects were assessed for each stressor, (heat or drought or  
202 starvation) in *D. ananassae* flies of wet or dry seasons. For each stressor, different groups (three  
203 replicates of thirty flies each) of acclimated flies were tested for changes in other two stress  
204 related traits. Thus, for three stressors (heat or desiccation or starvation), we tested nine  
205 acclimation-by-test combinations (i.e. three direct effects + six cross tolerance effects). For

206 analysis of cross-tolerance, acclimated/hardened fly groups were tested for changes  
207 (increase/decrease/no effect) in the level of each stress resistance trait. Therefore, for testing  
208 direct and cross tolerance due to (i) heat hardening, three groups of thirty flies of both the sexes  
209 were subjected to 2 h heat stress followed by 2 h recovery period on nutrient agar medium; and  
210 thereafter flies were analyzed for change in heat knockdown, desiccation or starvation  
211 resistance. (ii) Desiccation acclimation was given to flies for 4 h followed by 4h recovery period;  
212 and these flies were analyzed for heat knockdown, desiccation and starvation resistance. (iii)  
213 Flies were exposed to 20 h for starvation acclimation followed by 15h recovery period; followed  
214 by testing for changes in heat knockdown, starvation and desiccation resistance.

215

### 216 **Estimation of energy metabolites**

217 **(a)** Body lipid content was estimated on G<sub>1</sub> or G<sub>2</sub> flies (three replicates of thirty flies of each  
218 season and sex) reared under wet or dry season specific conditions. For lipid content individual  
219 fly was dried in 2 ml Eppendorf tubes (<http://www.tarsons.in>) at 60 °C for 48 h and then weighed  
220 on Sartorius microbalance (Model-CPA26P; 0.001 mg precision; <http://www.sartorius.com>).  
221 Thereafter, 1.5 ml di-ethyl ether was added in each Eppendorf tube and kept for 24 h under  
222 continuous shaking (200 rpm) at 37 °C. Finally, the solvent was removed and individuals were  
223 again dried at 60 °C for 24 h and reweighed. Lipid content was calculated per individual by  
224 subtracting the lipid-free dry mass from initial dry mass per fly.

225

226 **(b)** For trehalose content estimation, each of the three replicates of thirty flies of each season and  
227 sex were homogenized in a homogenizer (Labsonic@ M; <http://www.sartorius.com>) with 300  
228 µl Na<sub>2</sub>CO<sub>3</sub> and incubated at 95 °C for 2 h to denature proteins. An aqueous solution of 150 µl  
229 acetic acid (1 M) and 600 µl sodium acetate (0.2 M) was mixed with the homogenate. Thereafter,  
230 the homogenate was centrifuged (Fresco 21, Thermo-Fisher Scientific, Pittsburgh, USA) at  
231 12,000 rpm (9660 ×g) for 10 min. For trehalose estimation, aliquots (200 µl) were placed in two  
232 different tubes; one was taken as a blank whereas the other was digested with trehalase at 37 °C  
233 using the Megazyme trehalose assay kit (K-Treh 10/10, <http://www.megazyme.com>). In this  
234 assay, released D-glucose was phosphorylated by hexokinase and ATP to glucose-6-phosphate  
235 and ADP, which was further coupled with glucose-6-phosphate dehydrogenase and resulted in  
236 the reduction of nicotinamide adenine dinucleotide (NAD). The absorbance by NADH was



237 measured at 630 nm (UV-2450-VIS, Shimadzu Scientific Instruments, Columbia, USA). The  
238 pre-existing glucose level in the sample was determined in a control reaction lacking trehalase  
239 and subtracted from total glucose concentration.

240

241 (c) Proline content was estimated in each of the three replicates of thirty flies of each season and  
242 sex. Proline concentrations in fly homogenates were determined by the modified method after  
243 Bergman and Loxley (1970). In this assay, interference from primary amino acids gets  
244 eliminated by nitrous acid treatment and the excess nitrous acid is removed by heating with  
245 ammonium chloride followed by hydrochloric acid. Interfering materials are also removed by  
246 absorption to the protein-sulphosalicylic acid complex.

247 Thirty adult flies were homogenized in 3 ml of sulphosalicylic acid. Following  
248 centrifugation, 50  $\mu$ l of the homogenate was added to 15  $\mu$ l of freshly prepared 1.25 M sodium  
249 nitrite solution and content were mixed and kept at room temperature for 20min. Further, 15  $\mu$ l  
250 of 1.25M ammonium chloride solution added and content were mixed followed by addition of 60  
251  $\mu$ l of concentrated hydrochloric acid. The content were mixed and heated in a boiling water bath  
252 for 20 min. The tubes were cooled and 60  $\mu$ l of 10 N sodium hydroxide was added. To the  
253 resulting solution, we added 200  $\mu$ l glacial acetic acid and 200  $\mu$ l of ninhydrin solution in each  
254 capped tube. The solutions were mixed and incubated for 60 min. at 100 °C. Following  
255 incubation, the samples were extracted with toluene, and absorbance of the aqueous phase was  
256 quantified spectro-photometrically at 520 nm and the amount of proline was estimated in  
257 reference to a standard curve.

258

### 259 **Analysis of rate of change in energy metabolites after hardening/acclimation pre-** 260 **treatments**

261 We conducted independent experiments for each stressor to find change in the rate of  
262 accumulation or utilization of three energy metabolites (trehalose, proline and body lipids). Such  
263 changes were assessed in three replicates of thirty flies of each season as well as sex as a  
264 function of different time durations of hardening/ acclimation by a stressor. Independent groups  
265 of flies were (a) heat hardened for 1h, 2h, 3h, 4h and 5h at 34°C with 2h recovery ;(b)  
266 desiccation acclimation for 1h, 2h, 3h, 4h and 5h at 8% relative humidity with 4h recovery ; (c)

267 starvation acclimation for 10h,15h, 20h, 25h and 30h followed by 15h recovery; and these  
268 respective flies were tested for changes in the level of each of three energy metabolites.

269

### 270 **Assessment of energy metabolites mediated cross-protection**

271 For acclimated as well as non-acclimated (control flies), changes in three energy metabolites  
272 (trehalose, body lipids and proline content) due to each stressor were measured in three replicates  
273 each of thirty flies. This was done for flies reared under season-specific wet or dry conditions.  
274 For such analysis, we used data on flies after heat hardening (2 h heat stress followed by 2 h  
275 recovery); (ii) desiccation (5 h acclimation followed by 4 h recovery); (iii) starvation (25 h  
276 starvation acclimation followed by 15h recovery). Finally, percent change in accumulation or  
277 utilization of three energy metabolites due each stressor were calculated to find possible cross-  
278 protection between multiple stressors.

279

### 280 **Treatment and analysis of data**

281 Data for heat knockdown time at 37°C (in minutes and seconds) were recorded on individual  
282 male and female flies of *D. ananassae* reared under wet or dry season specific simulated  
283 condition. For other two stressors (desiccation or starvation), we recorded survival mortality of  
284 10 flies per vial as a function of shorter (at hourly) for desiccation; and twice daily (8am and  
285 8pm) for starvation resistance till all the flies died. For each season and sex, (three replicates of  
286 thirty flies), data on basal level (or control) and hardened/acclimated flies were represented as  
287 mean  $\pm$  s.e.m. (Table 1) while effects of treatments and sex were calculated on the basis of  
288 ANOVA (supplementary tables). Seasonal differences in stress related traits were compared with  
289 ‘t’ test as well as in terms of fold differences (Table 1).

290 The data on assays for three stressors (heat, drought or starvation) were used for  
291 calculating absolute acclimation/hardening capacity -AAC (i.e. difference in trait values between  
292 acclimated flies – control flies) following Kellett et al (2005). Further, we also calculated relative  
293 acclimation capacity – RAC (i.e. absolute acclimation capacity divided by control value of  
294 unacclimated flies). For all the three stress related traits, we represented AAC in the form of bars  
295 while RAC values were depicted on the top of each bar. Illustrations depicted simultaneous  
296 comparison of direct acclimation effect as well as cross tolerance effects for male and female  
297 flies of wet or dry season (Fig 1 to 3). For heat resistance, correlation between direct heat

298 hardening effect and cross-tolerance effects due to desiccation acclimation was represented (with  
299 Box-whisker) for flies of two seasons as well as sexes. Further, we represented relationship  
300 between heat hardening effect on starvation as well as on heat knockdown (Fig. 4).

301 In accordance with the objectives of this study, data on sum of three energy metabolites  
302 ( $\mu\text{g mg}^{-1} \text{fly}^{-1}$ ) in control flies were compared with heat hardened or flies acclimated to  
303 desiccation and starvation; and percent changes (+ or -) were calculated to compare acclimation  
304 effects across seasons and sexes (Table 2).

305 Data obtained from independent sets of experiments on rate of metabolite change as a  
306 consequence of different durations (1h, 2h, 3h, 4h or 5h) for heat hardening or desiccation  
307 acclimation; were subjected to regression analysis for calculation of regression slope values  
308 (Table 3); and seasonal differences in slope values were compared with 't' test. Finally, season  
309 specific differences in the accumulation and utilization (calculated in terms of percent increase or  
310 decrease) of three energy metabolites (body lipids, trehalose and proline) due to either heat  
311 hardening or acclimation to desiccation or starvation were schematically represented to highlight  
312 possible energy metabolite mediated cross-protection in wet or dry season female flies (Fig. 5).  
313 For stressor acclimated/hardened flies, the energy content (trehalose, proline and body lipids)  
314 was calculated using standard conversion factors (Schmidt-Nielsen, 1990). The amount of each  
315 energy metabolite was multiplied by conversion factor i.e. for trehalose ( $17.6 \text{ Jmg}^{-1}$ ); for body  
316 lipid ( $39.3 \text{ Jmg}^{-1}$ ); and proline ( $17.8 \text{ Jmg}^{-1}$ ). Statistical calculations and illustrations were made  
317 with the help of Statistica 5.0 as well as Statistica 7.

318

## 319 **RESULTS**

### 320 **Seasonal differences in stress resistance and energy metabolites**

321 Data on seasonal differences (wet vs dry) for six traits of *D. ananassae* flies reared under season  
322 specific simulated conditions are shown in Table 1. For heat knockdown, starvation resistance  
323 and body lipids, wet season flies revealed significantly higher trait values as compared with dry  
324 season flies (Table 1). For dry season flies, desiccation resistance and the amount of trehalose  
325 and proline were significantly higher. For all the traits, season specific differences were  
326 significant for both the sexes ( $p < 0.001$ ; Table 1).

### 327 **Plastic changes in heat knockdown of wet vs dry season flies**

328 For heat knockdown, data on absolute hardening capacity (acclimated – control values) due to  
329 direct hardening as well as cross tolerance effects due to desiccation or starvation acclimation are  
330 illustrated in Fig. 1. The wet season flies (both sexes) showed significant increase in heat  
331 knockdown due to heat hardening as well as cross resistance effect of desiccation (Fig. 1A,B).  
332 However, starvation acclimated flies of wet season showed lesser increase in heat knockdown  
333 (Fig. 1A,B). In contrast, in dry season flies, heat knockdown duration decreased as a  
334 consequences of cross tolerance effect due to starvation acclimation (Fig. 1C). However, plastic  
335 changes in heat knockdown of dry season flies due to direct heat hardening and cross tolerance  
336 effect after desiccation acclimation were 50 to 60% lower (Fig. 1C,D). Thus, direct effect due to  
337 heat hardening as well as cross tolerance effects significantly improved heat resistance of wet  
338 season flies as compared with dry season flies (Fig. 1).

### 339 **Season specific plastic changes in desiccation resistance**

340 Wet season flies exhibited lower acclimation effects due to desiccation acclimation as well as  
341 cross tolerance effect of heat hardened flies (Fig. 2A,B) as compared with dry season flies (Fig.  
342 2C,D). There was a trade-off between desiccation and starvation resistance. We observed two  
343 fold reduction in desiccation resistance of starvation acclimated flies of dry season as compared  
344 with wet season.

### 345 **Seasonal plastic changes in starvation resistance**

346 For starvation resistance, wet season flies exhibited significantly higher effect of direct starvation  
347 acclimation as well as cross-tolerance due to heat hardening as compared with dry season flies  
348 (Fig. 3). In case of desiccation acclimated flies, there was greater reduction in starvation  
349 resistance of dry season flies as compared with wet season flies.

### 350 **Relationship between heat hardening effects with other traits**

351 *D. ananassae* flies are acclimatized to multiple stressors in its natural habitats across season. For  
352 seasonal changes in heat knockdown, we found positive relationship between direct heat  
353 hardening and cross tolerance due to desiccation acclimation (Fig. 4A). Thus, significant  
354 increase in heat resistance of wet season flies results due to plastic effects of heat as well as  
355 drought (Fig. 4A). Inter-related plastic changes between resistance to heat and starvation as a

356 consequence of heat hardening are shown in Fig. 4B. Therefore, heat hardening of wet season  
357 flies resulted in higher resistance to both heat and starvation while such effects were lower for  
358 dry season flies.

### 359 **Assessment of relative hardening / acclimation capacity**

360 Results of relative acclimation capacity (RAC) for direct as well as cross-tolerance plastic effects  
361 for three stressors are shown in Fig. 1-3. In wet season flies, direct acclimation effects were  
362 maximum for starvation acclimation followed by heat hardening. However, direct effect of  
363 desiccation acclimation was higher for dry season flies as compared with wet season flies. RAC  
364 values for cross-tolerance effects (SA on HK); (DA on HK) and (DA on HH) were quite similar  
365 i.e.  $RAC = \sim 0.20$  (Fig. 1-3). These observations suggest that RAC values for direct acclimation /  
366 hardening are stressor specific while cross tolerance effects could be conserved for a species.  
367 This assumption needs further verification for its generality among *Drosophila* species. Further,  
368 we observed a trade-off between RAC values of cross-tolerance effects of DA vs SA but such  
369 effects were significantly higher for dry season flies (Fig. 2 & 3). Finally, cross-tolerance effect  
370 of SA on heat knockdown was positive in wet season flies but there was a trade off (SA on HK)  
371 in dry season flies (Fig. 1). We also found sex-specific minor differences in RAC for stress  
372 related traits of wet or dry season flies (Fig. 1-3).

### 373 **Season specific plastic changes in energy budget**

374 Energy budget based on three energy metabolites (trehalose, proline and body lipids per fly) in  
375 control and heat hardened or flies acclimated to desiccation or starvation are shown in Table 2.  
376 There is significant increase ( $\sim 73\%$  in females and  $\sim 62\%$  in male) in the energy budget of wet  
377 season flies due to heat hardening (Table 2) while such changes in the energy budget of dry  
378 season flies are sixty percent lower. In contrast, there is  $\sim 12\%$  gain in energy budget due to  
379 desiccation acclimation of dry season flies as compared with  $\sim 4\%$  in the wet season flies.  
380 Further, starvation acclimated flies of wet season consumed about 40 percent of energy budget  
381 per fly as compared with  $\sim 14\%$  in dry season flies. These observations show plastic changes in  
382 energy budget are stressor as well as season specific while both the sexes reveal similar trends.

### 383 **Cross-protection between accumulation and utilization of energy metabolites**

384 In *D. ananassae* flies reared under wet or dry conditions, we found significant differences in the  
385 stressor specific levels of accumulation and utilization of trehalose, proline and body lipids (Fig.  
386 5). This schematic diagram shows that body lipids increase due to heat hardening i.e. ~ 79% in  
387 wet season flies as compared with 48% for dry season flies. There is cross-protection between  
388 accumulation of body lipids due to heat hardening and utilization under starvation. In contrast,  
389 proline was elicited by desiccation acclimated flies of dry season only. However, desiccation  
390 acclimated wet season flies accumulated 115% more trehalose than control flies. Further, heat  
391 hardening of wet season flies utilized 50% of the accumulated trehalose. For dry season flies,  
392 desiccation induced plastic changes accumulated only 30% more trehalose but 60% more amount  
393 of proline which were partially utilized under heat hardening. Thus, plastic changes in three  
394 energy metabolites (trehalose, proline and body lipids) are consistent with cross-protection  
395 between three stressors (heat, drought and starvation).

#### 396 **Stressor specific rates of change in energy metabolites**

397 We found significant seasonal differences in stressor specific (heat, drought or starvation)  
398 changes (accumulation or utilization) in the levels of each of the three energy metabolites as a  
399 function of different durations of hardening / acclimation of wet or dry season flies (Table 3).  
400 For body lipids and trehalose, the rates of change were significantly higher for wet season flies  
401 as compared with dry season flies. Sex-specific differences in the rates of metabolite change  
402 were observed only in the wet season flies (Table 3). Further, changes in the level of proline  
403 were found only in dry season flies.

#### 404 **Results of ANOVA on stress related traits**

405 In supplementary Table S1, we have shown results of ANOVA for three stress related traits  
406 (heat, drought or starvation) with respect to three variables (control vs acclimated; sexes and  
407 seasons) in *D. ananassae* flies reared under wet or dry season specific conditions. For all the  
408 three stress related traits, we found highly significant differences ( $p < 0.001$ ) across sexes,  
409 seasons and due to acclimation as well as due to their respective interactions (Table S1).  
410 Similarly the results of ANOVA on three energy metabolites are shown in supplementary table  
411 S2 which also showed significant differences ( $p < 0.001$ ) for all the variables.

412

## 413 **DISCUSSION**

414 We observed humidity driven significant plastic changes in the stress related traits (heat  
415 knockdown, and resistance to desiccation or starvation); and three energy metabolites (proline,  
416 trehalose and body lipids) in *D. ananassae* flies reared under wet or dry season specific  
417 simulated conditions. Basal levels of stress resistance and energy metabolites differ significantly  
418 due to developmental acclimation. The effects of heat hardening as well as desiccation  
419 acclimation significantly improved heat knockdown in wet season flies. Further, heat hardening  
420 also increased starvation resistance in wet season flies. However, dry season flies showed higher  
421 levels of proline as well as desiccation resistance but a lower amount of trehalose. Therefore,  
422 proline can be considered as a marker metabolite because accumulation of proline was evident  
423 only in drought acclimated flies of dry season. Stressor specific changes in energy budget per fly  
424 support cross-protection between heat hardening and desiccation or starvation resistance. Thus,  
425 seasonal differences in relative humidity (wet or dry) induced cross-protective plastic changes in  
426 three energy metabolites are consistent with energetic homeostasis and for coping season specific  
427 stressful environments.

### 428 **Seasonal differences in cross-tolerance effects**

429 Previous studies on cross-tolerance to multiple stressors did not consider impact of both  
430 developmental as well as adult acclimation effects of wet or dry conditions (Angilletta, 2009;  
431 Sinclair et al., 2013). In the present work, we examined such acclimation effects on tropical *D.*  
432 *ananassae*. In heat hardened flies (of wet or dry seasons), cross-tolerance effects on desiccation  
433 was higher for dry than wet season flies. However, such cross-tolerance effect on starvation  
434 tolerance was more in wet than dry season flies (Fig. 2,3). In contrast, in starvation acclimated  
435 flies cross-tolerance effects on heat resistance showed season specific contrasting differences i.e.  
436 a positive effect in wet season flies (Fig. 1A,B) but a negative effect in dry season flies (Fig.  
437 1C,D). Therefore, cross-tolerance effects of starvation acclimated flies on heat knockdown differ  
438 across seasons. Further based on genetic effects, a previous study has shown lack of trade-off  
439 between resistance to heat and other stress related traits in *D. melanogaster* (Williams et. al.,  
440 2012). Thus, genetic and plastic effects of multiple stressors seem to differ in impacting heat  
441 tolerance but this assumption needs further analysis. In *D. ananassae*, cross-tolerance effects in  
442 two cases (a) plastic response of starvation acclimation on desiccation resistance (Fig. 2); (b)  
443 effect of desiccation acclimation on starvation resistance (Fig. 3) showed trade-off with greater

444 effect in dry than wet season flies (Fig. 2,3). These observations are consistent with a trade-off  
445 between resistance to desiccation or starvation in geographical populations of some tropical  
446 drosophilids on the Indian subcontinents (Parkash and Munjal, 1999). Thus, we find similarity  
447 between plastic and genetic effects for desiccation vs starvation resistance in geographical as  
448 well as seasonal populations of tropical *Drosophila* species.

#### 449 **Stressor specific relative acclimation capacity differ across wet-dry seasonal flies**

450 Relative acclimation capacity (RAC) is a quantitative measure to compare stressor induced  
451 plastic changes across species as well as within species i.e. seasonal or geographical populations  
452 of ectothermic organisms (Kellett et al., 2005). The magnitude of RAC for heat knockdown has  
453 been found to be similar (RAC = 0.25) in interspecific comparisons of four species each of  
454 *melanogaster* species group and montium species group (Kellett et al., 2005). In contrast, in *D.*  
455 *melanogaster* flies reared at 18, 25 and 28 °C showed variable effects of thermal developmental  
456 acclimation on heat knockdown i.e. RAC ~ 0.35 for 18 or 25 °C reared flies but no RAC effect  
457 for 28 °C flies (Cavicchi et al., 1995). Further, geographical populations of *D. melanogaster*  
458 from east coast of Australia revealed RAC values in the range of 0.13 to 0.58 for heat  
459 knockdown (Sgro et al., 2010). However, we are not aware of studies related to assessment of  
460 quantitative differences in stressor specific relative acclimation capacity in seasonally varying  
461 populations of diverse insect taxa. In the present work, we found significant season specific (wet  
462 or dry) as well as stressor specific differences in relative acclimation capacity (Fig. 1-3). For  
463 direct acclimation effects, RAC values were in the order of SA = 0.53 > HH = 0.36 > DA = 0.25.  
464 In contrast, cross-tolerance RAC values were quite similar (RAC = ~ 0.20) for HH on SR, DA on  
465 HK (wet season flies) and HH on DR (dry season flies). The generality of such observations  
466 need further studies. Another interesting observation was cross-tolerance effect of starvation  
467 acclimation on heat knockdown i.e. a positive effect in wet season flies but a negative  
468 relationship (trade-off) in dry season flies. Thus, we found season specific and stressor specific  
469 differences in RAC effects in low vs high humidity reared flies of *D. ananassae*.

470

#### 471 **Wet-dry seasonal flies differ in dehydration induced accumulation of osmoprotectants**

472 Cold induced plastic changes in energy metabolites have revealed accumulation of trehalose as  
473 osmoprotectant (Shimada and Riihima, 1990; Benoit et al., 2009; Colinet et al., 2012) but not in  
474 *Sarcophaga crassipalpis* (Michaud and Denlinger, 2007). In the present work, drought induced



475 accumulation of proline is associated with acclimatization of *D. ananassae* to drier conditions.  
476 *D. ananassae* flies (reared under dry season condition) showed significant accumulation of  
477 proline but a lower level of trehalose. However, *D. ananassae* flies reared under wet condition  
478 did not elicit proline at all despite accumulation of a significant level of trehalose (Fig. 5).  
479 Further, drought induced plastic changes in proline have been observed both for a cold adapted  
480 *D. immigrans* (Tamang et al., 2017) as well as warm adapted *Z. indianus* (Kalra et al., 2017).  
481 These studies suggest a possible role of proline as osmoprotectant in drosophilids reared under  
482 either colder and drier; or warmer and drier conditions. However, further studies are needed to  
483 support such observations.

#### 484 **Cross-protection through inter-related plastic changes in metabolic fuels**

485 In wild habitats, colder or warmer environments are coupled with wet or dry or possible  
486 starvation conditions; and insects are likely to evolve cross-protection mechanisms to multiple  
487 stressors. It is known that cold stress with coupled drought level is able to elicit multifunctional  
488 colligative solutes (sugars, polyols, proline as free amino acids). Possible inter-related  
489 modulatory changes (cross-protection) in the accumulation and utilization of metabolic fuels  
490 could favor energetic homeostasis. For example, a previous study has shown drought stress  
491 induced higher level of proline but exhibited its utilization under cold stress in winter population  
492 of *D. immigrans* (Tamang et al., 2017). In present work on tropical *D. ananassae*, we observed  
493 cross-protection between heat hardening and two coupled stressors i.e. drought or starvation. We  
494 found inter-related changes in three metabolic fuels both for wet or dry season flies of *D.*  
495 *ananassae*. Inter-relationship between heat hardening induced accumulation of body lipids and  
496 its consumption in starvation acclimated flies was evident for both the seasons but body lipid  
497 changes were 60 % higher for wet season flies as compared with dry season. Such observations  
498 are consistent with season specific differences in starvation resistance levels due to  
499 developmental and adult acclimation. However, inter-related metabolic changes due to heat  
500 hardening or desiccation acclimation involved accumulation and utilization of proline only in dry  
501 season flies. In contrast, we observed four fold higher (~ 115 %) accumulation of trehalose in  
502 wet season flies as compared to dry season flies. Trehalose as osmoprotectant is known to  
503 counter the detrimental effects of drought stress on cellular membranes and cellular proteins.  
504 Thus, plastic changes in metabolic fuels due to multiple stressors seem to involve inter-related  
505 compensatory mechanisms to cope with the season specific wet or dry conditions.

506 Energetic changes in stressor induced and control groups of flies can also help in  
507 understanding cross-protection. Energy budget changes per fly (based on three metabolites) were  
508 significantly higher (~ 70%) in wet season flies subjected to heat hardening but only (~ 4%) due  
509 to desiccation acclimation while starvation acclimation consumed energy budget (~ 40 %) as  
510 compared to control or unacclimated flies (Fig.5). Thus, wet season flies facing multiple  
511 stressors (heat or drought or starvation) are able to maintain its energy budget homeostasis. In  
512 case of dry season flies, energy budget changes revealed ~ 30% increase due to heat hardening  
513 and 12 % with desiccation acclimation while starvation acclimation consumed 15 %, thereby  
514 showing a favorable energy balance under harsh dry conditions (Fig. 5). Thus, inter-related  
515 stressor induced changes in three energy metabolite seem consistent with possible energetic  
516 homeostasis.

### 517 **Thermoprotective effects of proline and trehalose**

518 Some studies have examined detailed mechanisms for thermal protection of various cellular  
519 proteins and cell membranes by trehalose and / or proline supporting their ubiquitous role in  
520 stabilizing cellular components against detrimental effects of cold or heat (Kaushik and Bhatt,  
521 2003; Yancey et al., 1982; Reina-Bueno et al., 2012; Liang et al., 2013). Both proline and / or  
522 trehalose provide cryoprotection in insects such as temperate *Chymomyza costata*, *Belgica*  
523 *Antarctica* and *D. melanogaster* adults as well as larvae (Kostal et al., 2011b; Benoit et al., 2009;  
524 Colinet et al., 2012; Kostal et al., 2011a) and also in different plant taxa (Szabados and Savoure,  
525 2009). However, thermoprotective role of these two energy metabolites to heat stress have been  
526 less documented. First, metabolic profiling of heat hardened *D. melanogaster* adults showed  
527 elevated levels of alanine; and tyrosine (a precursor of stress hormones in insects) during  
528 recovery period (Malmendal et al., 2006). Since, alanine results due to proline oxidation during  
529 energy generation, utilization of proline can be argued during recovery of heat hardened *D.*  
530 *melanogaster* as reported by Malmendal and colleagues (2006). Second, association between  
531 heat and proline has been observed in beetle– *Alphitobius diaperinus* maintained at 28 °C  
532 because proline amount constituted 50% out of a pool of 16 amino acids (Renault et al., 2006).  
533 Third, thermoprotective role of proline as well as of trehalose has been suggested in some plant  
534 taxa (Verbruggen and Hermans, 2008; Szabados and Savoure, 2009); and in soil bacterium  
535 *Rhizobium etli* (Reina-Bueno et al., 2012). For *D. ananassae*, we observed partial utilization of  
536 proline when dry season flies were subjected to heat hardening (Fig. 5) but we did not examine

537 possible elevation of alanine due to proline oxidation. Thus, further studies are needed to analyse  
538 osmo- as well as thermoprotective roles of proline in seasonally varying wild populations of  
539 different warm adapted drosophilids.

540 We observed complementary metabolic changes in accumulation and utilization of  
541 trehalose and proline in response to desiccation and heat stress in wet or dry season flies.  
542 Accumulation of proline occurred only in dry season flies in response to desiccation acclimation.  
543 We observed variable levels of trehalose in wet vs dry season flies. However, heat hardening  
544 resulted in partial utilization of trehalose in wet season flies but both proline and trehalose in dry  
545 season flies. Thus, proline could be a marker metabolite for dry season flies. Inter-related  
546 changes due to heat hardening and starvation acclimation involved accumulation and utilization  
547 of body lipids. Finally, we assessed energy budget changes per fly in control vs flies hardened /  
548 acclimated to heat or drought or starvation. For both the seasons (wet or dry) and sexes, heat  
549 hardening increased energy budget per fly due to build up of body lipids which were used during  
550 starvation. Thus, energy budget changes due to stressors resulted in cross-protection as well as  
551 maintenance of energetic homeostasis both under wet or dry climatic conditions. We may  
552 suggest that plastic induced changes in stress resistance traits and energy metabolites in *D.*  
553 *ananassae* are likely to counter future drier conditions expected due to climate change.

554

#### 555 **Competing interest**

556 The authors declare no competing or financial interest

557

#### 558 **Author contributions**

559 A.P. and C.L. did laboratory as well as data analysis; and R.P. wrote the MS.

560

#### 561 **Funding**

562 Financial assistance from the University grants commission, New Delhi to R.P (Emeritus -2015-  
563 17-GEN-8112/SA-II) and to C. L. as Post-Doctoral fellow (PDFSS-2015-17-HAR-11910) is  
564 gratefully acknowledged.

565

566

567

568 **REFERENCES**

- 569 **Andrewartha, H.G. and Birch, L.C.** (1970). *The distribution and abundance of animals*. Chicago  
570 University Press.
- 571 **Angilletta, M.J.** (2009). *Thermal adaptation: A Theoretical and Empirical Synthesis*. Oxford, UK:  
572 Oxford University Press.
- 573 **Benoit, J.B., Lopez-martinez, G., Elnitsky, M.A., Lee, R.E. and Denlinger, D.L.** (2009).  
574 Dehydration-induced cross tolerance of *Belgica antarctica* larvae to cold and heat is facilitated by  
575 trehalose accumulation. *Comp. Biochem. Physiol.A.* **152**, 518–523.
- 576 **Bergman, I. and Loxley, R.** (1970). Improved spectrophotometric method for determination of  
577 proline in tissue hydrolysates. *Anal. Chem.* **42**, 702 – 706.
- 578 **Bubliy, O.A., Kristensen, T.N. and Loeschcke, V.** (2013). Stress-induced plastic responses in  
579 *Drosophila simulans* following exposure to combinations of temperature and humidity levels.  
580 *J. Exp. Biol.* **216**, 4601–4607.
- 581 **Cavicchi, S., Guerra, D., La Torre, V. and Huey, R.B.** (1995). Chromosomal analysis of heat-  
582 shock tolerance in *D. melanogaster* evolving at different temperatures in the laboratory.  
583 *Evolution* **49**, 676 – 684.
- 584 **Chen, Z., Cuin, A.T., Zhou, M., Twomey, A., Naidu, P.B. and Shabala, S.** (2007). Compatible  
585 solute accumulation and stress mitigating effects in barley genotypes contrasting in their salt  
586 tolerance. *J. Exp. Bot.* **58**, 4245 – 4255.
- 587 **Choudhary, N.L., Sairam, R.K. and Tyagi, A.** (2005). Expression of delta-l-pyrroline-5-  
588 carboxylate synthetase gene during drought in rice (*Oryza sativa* L.). *Ind. J. biochem.*  
589 *Biophys.* **42**, 366 – 370.
- 590 **Chown, S.L., Sorensen, J.G. and Terblanche, J.S.** (2011). Water loss in insects: an  
591 environmental change perspective. *J. Insect Physiol.* **57**, 1070–1084.
- 592 **Colinet, H., Larvor, V., Laparie, M. and Renault, D.** (2012). Exploring the plastic response to cold  
593 acclimation through metabolomics. *Funct. Ecol.* **26**, 711–722.
- 594 **Csonka, L.N. and Hanson, A.D.** (1991). Prokaryotic osmoregulation: genetics and physiology.  
595 *Annu. Rev. Microbiol.* **45**, 569–606.
- 596 **Denlinger, D.L. and Lee Jr. R.E.** (2010). *Insect Low Temperature Biology*. Cambridge Univ. Press,  
597 New York.

- 598 **Fields, P.G., Fleurat-Lessard, F., Lavenseau, L., Febvay, G., Peypelut, L. and Bonnot, G.**  
599 (1998). The effect of cold acclimation and deacclimation on cold tolerance, trehalose and free  
600 amino acid levels in *Sitophilus granaries* and *Cryptolestes ferrugineus* (Coleoptera). *J. Insect*  
601 *Physiol.* **44**, 955 – 965.
- 602 **Hoffmann, A.A.** (2010). Physiological climatic limits in *Drosophila*: patterns and implications. *J.*  
603 *Exp. Biol.* **213**, 870–880.
- 604 **Hofmann, A.A., Shirriffs, J. and Scott, M.** (2005). Relative importance of plastic vs genetic  
605 factors in adaptive differentiation: geographical variation for stress resistance in *Drosophila*  
606 *melanogaster* from eastern Australia. *Funct. Ecol.* **19**, 222 – 227.
- 607 **Issartel, J., Renault, D., Voituron, Y., Bouchereau, A., Vernon, P. and Hervant, F.** (2005).  
608 Metabolic responses to cold in subterranean crustaceans. *J. Exp. Biol.* **208**, 2923 – 2929.
- 609 **Kalra, B., Tamang, A.M. and Parkash R.** (2017). Cross-tolerance effects due to heat hardening,  
610 desiccation and starvation acclimation of drosophilid-*Zaprionus indianus*. *Comp. Biochem.*  
611 *Physiol. A.* **209**, 65 – 73.
- 612 **Kaushik, J.K. and Bhatt, R.** (2003). Why is trehalose an exceptional protein stabilizer? *J Biol*  
613 *Chem.* **278**, 26458 – 26465.
- 614 **Kellermann, V., Heerwaarden, V.B., Sgro, C.M. and Hoffmann, A.A.** (2009). Fundamental  
615 evolutionary limits in ecological traits drive *Drosophila* species distributions. *Science* **325**,  
616 1244 – 1246.
- 617 **Kellett, M., Hoffmann, A.A. and McKechnie, S.W.** (2005). Hardening capacity in the  
618 *Drosophila melanogaster* species group is constrained by basal thermotolerance. *Funct. Ecol.*  
619 **19**, 853–858.
- 620 **Kemble, A.R. and MacPherson, H.T.** (1954). Liberation of amino acids in perennial rye grass  
621 during wilting. *Biochem. J.* **58**, 46 – 59.
- 622 **Kostal, V., Zahradnickova, H. and Simek, P.** (2011a). Hyperprolinemic larvae of the drosophilid  
623 fly, *Chymomyza costata*, survive cryopreservation in liquid nitrogen. *Proc. Natl. Acad. Sci. U*  
624 *S A.* **108**, 13041–13046.
- 625 **Kostal, V., Korbelova, J., Rozsypa, J., Zahradnickova, H., Cimlova, J., Tomcala, A., Simek, P.**  
626 (2011b). Long-term cold acclimation extends survival time at 0 °C and modifies the Metabolomic  
627 profiles of the larvae of the fruit fly *Drosophila melanogaster*. *PLoS One* **6**, 1–10, e25025.

- 628 **Lee, R.E.**(2010). A primer on insect cold tolerance. In: Denlinger D.L, Lee R.E., editors. *Low*  
629 *temperature biology of insects*. Cambridge: Cambridge University Press. pp. 3-34.
- 630 **Liang, X., Zhang, Lu., Natarajan, S.K. and Becker, D.F.** (2013). Proline mechanisms of stress  
631 survival. *Antioxid Redox Signal*. **19**, 998 – 1011.
- 632 **Malmendal, A., Overgaard, J., Bundy, J.G., Sorenson, J.G., Nielsen, N.C., Loeschcke, V. and**  
633 **Holmstrup, M.** (2006). Metabolomic profiling of heat stress; hardening and recovery of  
634 homeostasis in *Drosophila*. *Am. J. Physiol*. **291**, R-205 – R-212.
- 635 **Michaud, M.R. and Denlinger, D.L.** (2007). Shifts in carbohydrates, polyols and amino acid  
636 pools during rapid cold hardening and diapause-associated cold hardening in flesh flies  
637 (*Sarcophaga crassipalpis*); a metabolomic comparison. *J. Comp. Physiol. B*. **177**, 753 – 763.
- 638 **Michaud, M.R., Benoit, J.B., Lopez-Martinez, G., Elnitsky, M.A., Lee Jr., R.E. and**  
639 **Denlinger, D.L.** (2008). Metabolomics reveals unique and shared changes in response to heat  
640 shock, freezing, and desiccation in the Antarctic midge, *Belgica antarctica*. *J. Insect Physiol*.  
641 **54**, 645–655.
- 642 **Misener, S.R., Chen, C.P. and Walker, V.K.** (2001). Cold tolerance and proline metabolic gene  
643 expression in *Drosophila melanogaster*. *J. Insect Physiol*. **47**, 393–400.
- 644 **Overgaard, J., Malmendal, A., Sørensen, J.G., Bundy, J.G., Loeschcke, V., Nielsen, N.C. and**  
645 **Holmstrup, M.** (2007). Metabolomic profiling of rapid cold hardening and cold shock in  
646 *Drosophila melanogaster*. *J. Insect Physiol*. **53**, 1218–1232.
- 647 **Parkash, R. and Munjal, A.K.** (1999). Climatic selection of starvation and desiccation resistance  
648 in populations of some tropical Drosophilids. *J. Zool. Syst. Evol. Res*. **37**, 195-202.
- 649 **Parkash, R., Singh, S. and Ramniwas, S.** (2009). Seasonal changes in humidity level in the  
650 tropics impact body color polymorphism and desiccation resistance in *Drosophila jambulina* –  
651 Evidence for melanism-desiccation hypothesis. *J. Insect Physiol*. **55**, 358 – 368.
- 652 **Parkash, R. and Ranga, P.** (2014). Seasonal changes in humidity impact drought resistance in  
653 tropical *Drosophila leontia*: testing developmental affects of thermal versus humidity  
654 changes. *Comp. Biochem. Physiol. A*. **169**, 33 – 43.
- 655 **Pires, C.S.S., Sujii, E.R., Frontes, E.M.G., Tauber, C.A. and Tauber, M.J.** (2000). Dry-season  
656 embryonic dormancy in *Deois flavopicta* (Homoptera: Cecropidae): roles of temperature and  
657 moisture in nature. *Envt. Entomol*. **29**, 714 – 720.

- 658 **Reina-Bueno, M., Argandoña, M., Nieto, J.J., Hidalgo-García, A., Iglesias-Guerra, F.,**  
659 **Delgado, M.J. and Vargas, C.** (2012). Role of trehalose in heat and desiccation tolerance in  
660 the soil bacterium *Rhizobium etli*. *BMC Microbiol.* **12**, 207-223.
- 661 **Renault, D., Bouchereau, A., Delettre, Y.R., Hervant, F. and Vernon, P.** (2006). Changes in  
662 free amino acids in *Alphitobius diaperinus* (Coleoptera: Tenebrionidae) during thermal and  
663 food stress. *Comp. Biochem. Physiol. A.* **143**, 279 – 285.
- 664 **Schmidt-Nielsen, K.** (1990). *Animal Physiology: Adaptation and Environment*. 4th edn. Cambridge  
665 University Press, Cambridge.
- 666 **Seymour, J.E. and Jones, R.E.** (2000). Humidity-mediated diapauses in the tropical braconid  
667 parasitoid *Microplitis demolitor*. *Ecol. Entomol.* **25**, 481 – 485.
- 668 **Sgro, C.M., Overgaard, J., Kristensen, T.N., Mitchell, K.A., Cockerell, F.E. and Hoffmann,**  
669 **A.A.** (2010). A comprehensive assessment of geographic variation in heat tolerance and  
670 hardening capacity in populations of *Drosophila melanogaster* from eastern Australia. *J. Evol.*  
671 *Biol.* **23**, 2484 – 2493.
- 672 **Shimada, K. and Riihima, A.** (1990). Cold-induced freezing tolerance in diapausing and non-  
673 diapausing larvae of *Chymomyza costata* (Diptera: Drosophilidae) with accumulation of trehalose  
674 and proline. *Cryo. Letters* **11**, 243–250.
- 675 **Sinclair, B.J.** (2015). Linking energetics and overwintering in temperate insects. *J. Therm. Biol.*  
676 **54**, 5–11.
- 677 **Sinclair, B.J., Ferguson, L.V., Salehipour-shirazi, G. and MacMillan, H.A.** (2013). Cross  
678 tolerance and cross-talk in the cold: relating low temperatures to desiccation and immune  
679 stress in insects. *Integr. Comp. Biol.* **53**, 545–556.
- 680 **Szabados, L. and Savoure, A.** (2009). Proline: a multifunctional amino acid. *Trends in Plant Sci.*  
681 **15**, 89 – 97.
- 682 **Tauber, M.J., Tauber, C.A. and Masaki, S.** (1986). *Seasonal adaptations of insects*. Oxford  
683 University press.
- 684 **Tauber, M.J., Tauber, C.A., Nyrop, J.P. and Villani, M.G.** (1998). Moisture, a vital but neglected  
685 factor in the seasonal ecology of insects: hypotheses and tests of mechanisms. *Environ. Entomol.*  
686 **27**, 523 – 530.

- 687 **Tamang, A.M., Kalra, B. and Parkash, R.** (2017). Cold and desiccation stress induced changes  
688 in the accumulation and utilization of proline and trehalose in seasonal populations of  
689 *Drosophila immigrans*. *Comp. Biochem. Physiol. A.* **203**, 304–313
- 690 **Verbruggen, N. and Hermans, C.** (2008) Proline accumulation in plants: a review. *Amino Acids*  
691 **35**, 753–759
- 692 **Whitman, D.W. and Ananthakrishnan, T.N.** (2009). *Phenotypic plasticity of insects: mechanisms*  
693 *and consequences*. Science Publishers, Enfield, USA.
- 694 **Williams, B.R., Heerwaarden, V.B., Dowling, D.K. and Sagro, C.M.** (2012). A multivariate test  
695 of evolutionary constraints for thermal tolerance in *Drosophila melanogaster*. *J. Evol. Bio.* **25**,  
696 1415-1426.
- 697 **Williams, C.M., Watanabe, M., Guarracino, M.R., Ferraro, M.B., Edison, A.S., Morgan, T.J.,**  
698 **Boroujerdi, A.F.B. and Hahn, D.** (2014). Cold adaptation shapes the robustness of metabolic  
699 networks in *Drosophila melanogaster*. *Evolution* **68**, 3505 – 3523.
- 700 **Yancey, P.H., Clark, M.E., Hand, S.C., Bowlus, R.D. and Somero, G.N.** (1982). Living with  
701 water stress: evolution of osmolyte systems. *Science* **217**, 1214–1222.

702

703

704

705

706

707

708

709

710

711

712



713 **Legends to figures**

714 **Figure 1. Plastic changes (acclimated trait value – control) in heat knockdown (minutes) as**  
715 **a consequence of heat hardening (direct effect) and due to cross tolerance effects of**  
716 **desiccation - DA or starvation – SA in *D. ananassae* of wet or dry season. Relative**  
717 **acclimation capacity (RAC) value is shown on top of each bar.**

718

719 **Figure 2. Wet or dry season as well as sex specific changes in desiccation resistance (h) as a**  
720 **consequence of desiccation acclimation (direct effect) and due to cross tolerance effects of**  
721 **heat hardened - HH or starvation acclimated -SA in *D. ananassae* of wet or dry season.**

722

723 **Figure 3. Comparison of plastic changes in starvation resistance (h) due to starvation**  
724 **acclimation (direct effect) and cross tolerance effects of heat hardened - HH or desiccation**  
725 **acclimated – DA in *D. ananassae* of wet or dry season.**

726

727 **Figure 4. (A) Relationship between plastic changes in heat knockdown due to direct effect**  
728 **of heat hardening (x-axis) versus cross tolerance effect due to desiccation acclimation (y-**  
729 **axis). (B) Correlation between plastic changes in heat knockdown as well as starvation**  
730 **resistance due to heat hardening in *D. ananassae* of wet or dry season. Percent changes in**  
731 **energy budget per fly due to plastic changes are indicated in parentheses.**

732

733 **Figure 5. Schematic representation of stressor induced (heat or drought or starvation)**  
734 **plastic changes (accumulation and utilization) of three energy metabolites (trehalose,**  
735 **proline and body lipids) in *D. ananassae* female flies of wet (A) or dry (B) season. Slanted**  
736 **arrows depict cross-protection effects.**

737

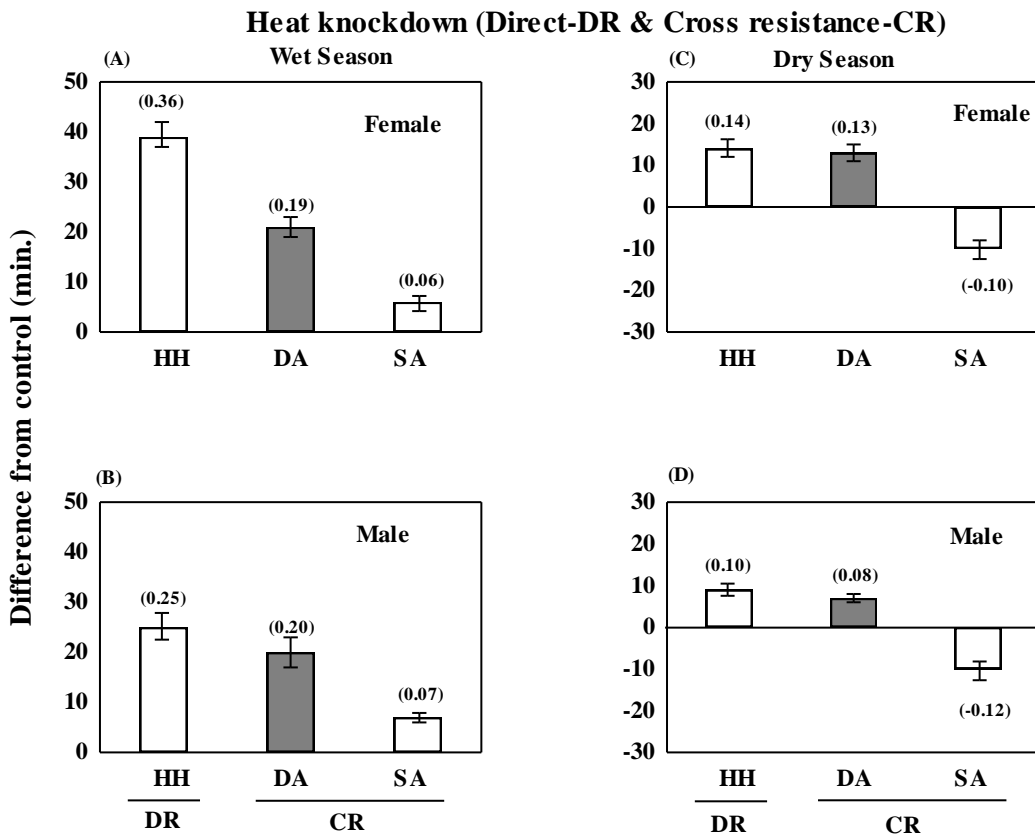

**Fig. 1. Plastic changes (acclimated trait value – control) in heat knockdown (minutes) as a consequence of heat hardening (direct effect) and due to cross tolerance effects of desiccation - DA or starvation – SA in *D. ananassae* of wet or dry season. Relative acclimation capacity (RAC) value is shown on top of each bar.**

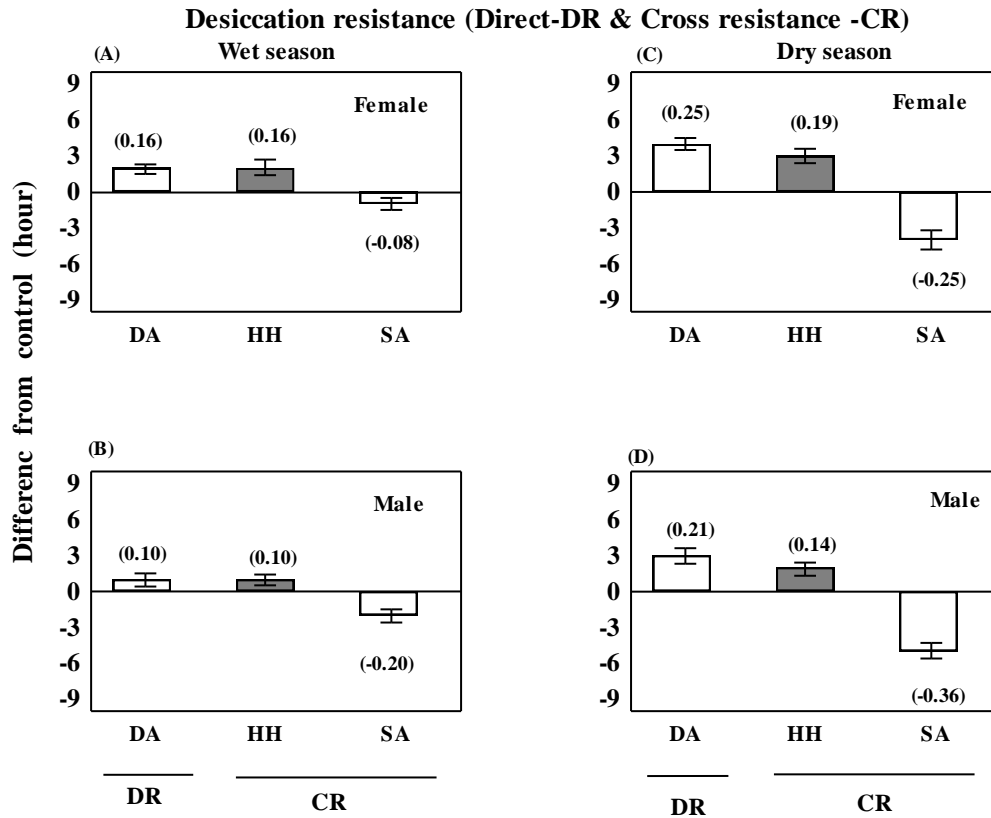

**Fig. 2. Wet or dry season as well as sex specific changes in desiccation resistance (h) as a consequence of desiccation acclimation (direct effect) and due to cross tolerance effects of heat hardened - HH or starvation acclimated -SA in *D. ananassae* of wet or dry season.**

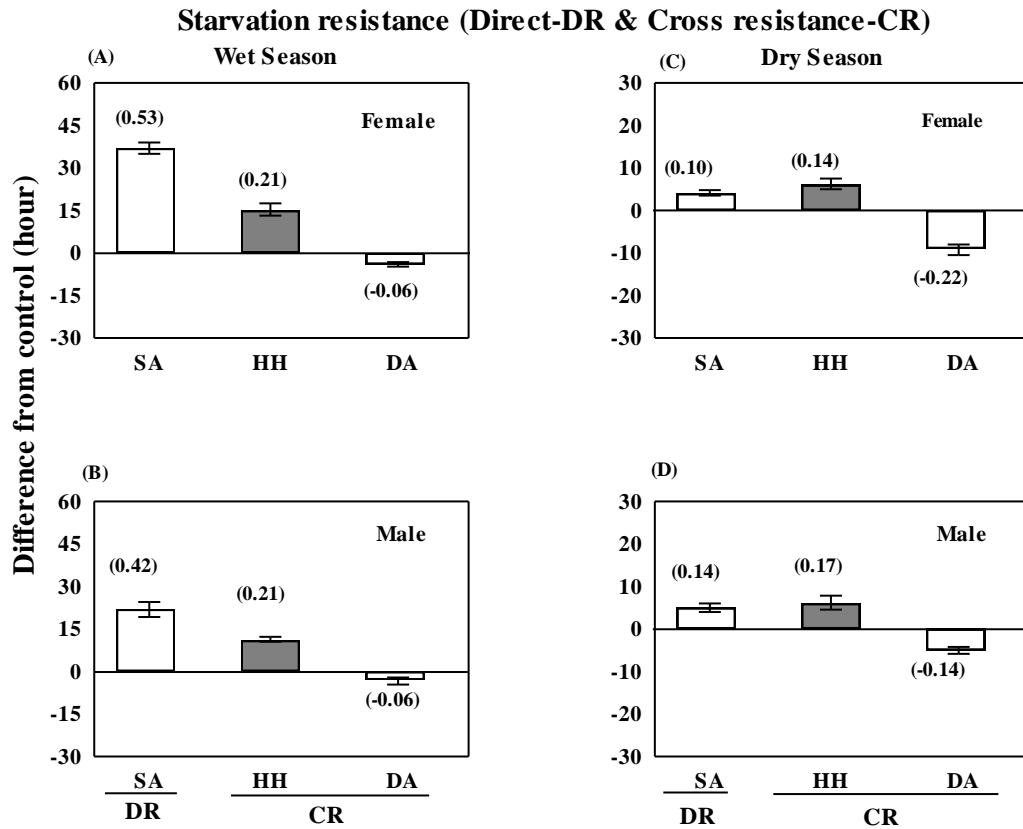

**Fig. 3. Comparison of plastic changes in starvation resistance (h) due to starvation acclimation (direct effect) and cross tolerance effects of heat hardened - HH or desiccation acclimated – DA in *D. ananassae* of wet or dry season.**

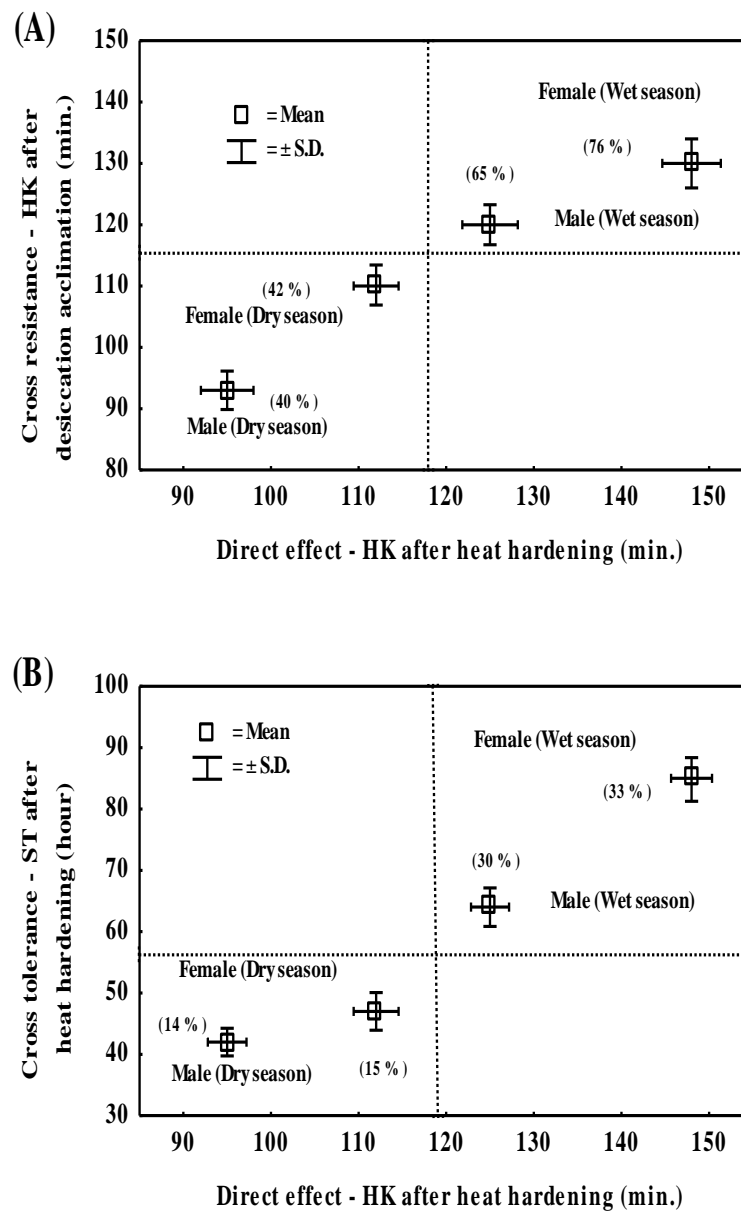

**Fig. 4.** (A) Relationship between plastic changes in heat knockdown due to direct effect of heat hardening (x-axis) versus cross tolerance effect due to desiccation acclimation (y-axis). (B) Correlation between plastic changes in heat knockdown as well as starvation resistance due to heat hardening in *D. ananassae* of wet or dry season. Percent changes in energy budget per fly due to plastic changes are indicated in parentheses.

| <b>(A) Cross-protection for wet-season female flies</b> |                                       |                         |                        |                 |
|---------------------------------------------------------|---------------------------------------|-------------------------|------------------------|-----------------|
|                                                         |                                       | <b>Accumulation (+)</b> | <b>Utilization (-)</b> | <b>Proline*</b> |
|                                                         |                                       |                         |                        | + or -          |
| (a)                                                     | <b>Heat hardening (2 hr)</b>          | ↑ Lipids (79%)          | (-72%) Trehalose ↓     | No              |
| (b)                                                     | <b>Desiccation acclimation (5 hr)</b> | ↑ Trehalose (115%)      | —                      | No              |
| (c)                                                     | <b>Starvation acclimation (25 hr)</b> | —                       | Lipids (-42%) ↓        | No              |

\*Lack of changes in the proline content in the wet season female flies

| <b>(B) Cross-protection for dry-season female flies</b> |                                       |                                      |                                        |  |  |
|---------------------------------------------------------|---------------------------------------|--------------------------------------|----------------------------------------|--|--|
|                                                         |                                       | <b>Accumulation (+)</b>              | <b>Utilization (-)</b>                 |  |  |
| (a)                                                     | <b>Heat hardening (2 hr)</b>          | ↑ Lipids (48%)                       | Trehalose (-15%) ↓<br>Proline (-50%) ↓ |  |  |
| (b)                                                     | <b>Desiccation acclimation (5 hr)</b> | ↑ Trehalose (30%)<br>↑ Proline (60%) | —                                      |  |  |
| (c)                                                     | <b>Starvation acclimation (25 hr)</b> | —                                    | Lipids (-20%) ↓                        |  |  |

**Fig. 5. Schematic representation of stressor induced (heat or drought or starvation) plastic changes (accumulation and utilization) of three energy metabolites (trehalose, proline and body lipids) in *D. ananassae* female flies of wet (A) or dry (B) season. Slanted arrows depict cross-protection effects.**

**Table 1. Data on seasonal differences in basal levels of stress resistance to heat, or desiccation or starvation stress and energy metabolites (trehalose, proline and body lipids) of *D. ananassae* flies grown under season specific simulated conditions (rainy or autumn). For each trait, data are mean  $\pm$  s.e.m for three replicates of thirty flies (n = 90).**

|     | Traits                                            | Sex | Wet season       | Dry season       | Fold | <i>t</i> -test |
|-----|---------------------------------------------------|-----|------------------|------------------|------|----------------|
| (a) | Heat Knock-down (min.)                            | F   | 109 $\pm$ 2.32   | 98 $\pm$ 3.12    | 1.11 | 12.78***       |
|     |                                                   | M   | 100 $\pm$ 4.13   | 86 $\pm$ 2.20    | 1.16 | 23.66***       |
| (b) | Desiccation resistance (h)                        | F   | 12 $\pm$ 0.56    | 16 $\pm$ 1.02    | 1.33 | 5.09***        |
|     |                                                   | M   | 10 $\pm$ 0.37    | 14 $\pm$ 0.78    | 1.40 | 4.48***        |
| (c) | Starvation resistance (h)                         | F   | 70 $\pm$ 2.13    | 41 $\pm$ 3.42    | 1.70 | 15.25***       |
|     |                                                   | M   | 53 $\pm$ 1.09    | 36 $\pm$ 3.02    | 1.47 | 32.22***       |
| (d) | Trehalose ( $\mu\text{g mg}^{-1}$ fly $^{-1}$ )   | F   | 11.20 $\pm$ 0.25 | 24.74 $\pm$ 0.44 | 2.20 | 18.72***       |
|     |                                                   | M   | 17.71 $\pm$ 0.13 | 22.31 $\pm$ 0.35 | 1.26 | 12.20***       |
| (e) | Proline ( $\mu\text{g mg}^{-1}$ fly $^{-1}$ )     | F   | 13.48 $\pm$ 0.11 | 48.55 $\pm$ 1.06 | 3.60 | 27.12***       |
|     |                                                   | M   | 18.19 $\pm$ 0.29 | 52.48 $\pm$ 1.48 | 2.89 | 45.40***       |
| (f) | Body lipids ( $\mu\text{g mg}^{-1}$ fly $^{-1}$ ) | F   | 190 $\pm$ 3.55   | 123 $\pm$ 2.56   | 1.54 | 56.30***       |
|     |                                                   | M   | 140 $\pm$ 3.02   | 108 $\pm$ 2.26   | 1.30 | 43.21***       |

\*\*\*  $P < 0.001$

**Table 2. Seasonal changes in the sum of energy budget per fly (for trehalose, proline and body lipids) due to direct-adult acclimation effects of heat hardening (2 h), desiccation acclimation (5 h) and starvation acclimation (25 h) of wet or dry season flies of *D. ananassae*. For each trait, data are shown as J mg<sup>-1</sup> fly<sup>-1</sup> along with percent change in parenthesis as compared with control (non acclimated flies).**

|      | Sum of energy budget (females) |                       | Sum of energy budget (males) |                       |
|------|--------------------------------|-----------------------|------------------------------|-----------------------|
|      | Wet season flies               | Dry season flies      | Wet season flies             | Dry season flies      |
| HA   | 13.66 ± 0.91 (+ 72.85)         | 7.94 ± 0.33 (+ 29.63) | 9.91 ± 0.98 (+ 61.44)        | 7.09 ± 0.15 (+ 27.17) |
| DA   | 8.17 ± 0.32 (+ 3.35)           | 6.85 ± 0.29 (+ 11.72) | 6.37 ± 0.37 (+ 3.73)         | 6.25 ± 0.24 (+ 12.35) |
| SA   | 4.76 ± 0.16 (- 39.73)          | 5.23 ± 0.11 (- 14.66) | 4.18 ± 0.28 (- 31.92)        | 4.82 ± 0.36 (- 13.41) |
| Cont | 7.91 ± 0.24                    | 6.13 ± 0.22           | 6.14 ± 0.33                  | 5.57 ± 0.28           |

Heat hardening = HA; Desiccation acclimation = DA; Starvation acclimation = SA; Cont = Control

Conversion factors include 17.6 J mg<sup>-1</sup> for trehalose, 39.3 J mg<sup>-1</sup> for lipids, 17.8 J mg<sup>-1</sup> for proline (Schmidt-Nielsen. 1990).



**Table 3. Rate of metabolite change (regression slope values) as a function of different durations of heat hardening or desiccation acclimation (1h or 2h or 3h or 4h and 5h); and starvation acclimation (10h or 15h or 20h or 25h and 30 h) for Wet and Dry season flies of *D. ananassae*.**

| Rate of change in each metabolite under heat, desiccation or starvation stress |     |            |            |                |
|--------------------------------------------------------------------------------|-----|------------|------------|----------------|
|                                                                                | Sex | Wet season | Dry season | <i>t</i> -test |
| <b>(a) Heat hardening (<math>\mu\text{g min}^{-1}</math>)</b>                  |     |            |            |                |
| Trehalose                                                                      | F   | -0.07      | -0.03      | 0.011**        |
|                                                                                | M   | -0.12      | -0.02      | 0.016***       |
| Proline                                                                        | F   | -----      | -0.20      | -----          |
|                                                                                | M   | -----      | -0.23      | -----          |
| Body lipids                                                                    | F   | +1.25      | +0.49      | 0.020***       |
|                                                                                | M   | +0.85      | +0.43      | 0.036***       |
| <b>(b) Desiccation acclimation (<math>\mu\text{g h}^{-1}</math>)</b>           |     |            |            |                |
| Trehalose                                                                      | F   | +2.14      | +1.14      | 1.03***        |
|                                                                                | M   | +3.02      | +0.96      | 0.98***        |
| Proline                                                                        | F   | -----      | +4.86      | -----          |
|                                                                                | M   | -----      | +4.79      | -----          |
| <b>(c) Starvation acclimation (<math>\mu\text{g h}^{-1}</math>)</b>            |     |            |            |                |
| Body lipids                                                                    | F   | -3.20      | -0.89      | 1.01***        |
|                                                                                | M   | -2.00      | -0.80      | 0.94***        |

Slope values represent rate of change of metabolites as a function of time. \*\* $P < 0.01$ , \*\*\*  $P < 0.001$
